# Supplementary material for: Genome-wide analysis of basic/helix-loop-helix gene family in peanut and assessment of its roles in pod development
Source: PLoS One. 2017 Jul 27;12(7):e0181843. doi: 10.1371/journal.pone.0181843 (PMC5531549; doi:10.1371/journal.pone.0181843)
Supplement: S2 Table — (XLSX) [file pone.0181843.s002.XLSX]

## Sheet: Sheet1
Supplementary Table 2. Description of peanut tissues collected for RNA-seq analysis
Library ID	Tissue	Stage/description	Library reps
S1	seedling leaf	10 d post-emergence; leaflets partially open	3
S2	main stem leaf	Growth stage Boote R1 – first flower; leaflets partially open, from main stem (n)	3
S3	lateral stem leaf	Growth stage Boote R1 – first flower; leaflets partially open, from laterals (n+1)	3
S4a	vegetative shoot tip	Growth stage Boote R1 – first flower, from mainstem (n); 5 mm maxium length	3
S5a	reproductive shoot tip	Growth stage Boote R1 – first flower, from laterals (n+1); 5 mm maxium length	3
S6	root	10 d post-emergence	3
S7	nodules	25 d post-emergence	3
S8a	perianth	Fully open, morning of anthesis; wings, banner, hypanthium, keel and lower lip of the calyx	3
S8c	gynoecium	Fully open, morning of anthesis; stigma, style and overy	3
S8b	androecium	Fully open, morning of anthesis; staminal tube, filaments and anthers	2
S9	aerial gynophore tip	5 mm (=mostly ovary and zone of cell division) from elongating peg prior to soil penetration	3
S10	subterranean gynophore tip	5 mm (=mostly ovary and zone of cell division) from elongating peg of approximately same length as #9, but 24 h after soil penetration	3
S11	Pattee 1 pod	Whole pod at pod swelling (Pattee stage 1)	2
S12	Pattee 1 stalk	Gynophore stalk at pod swelling (Pattee stage 1)	2
S13	Pattee 3 pod	Pericarp very watery, embryo very small and not easily removed (Pattee stage 3/4)	3
S14	Pattee 5 pericarp	Pericarp soft, not as watery, inner pericarp without cracks (Pattee stage 5)	3
S15	Pattee 5 seed	Embryo flat, white or just turning pink at one end (Pattee stage 5)	2
S16	Pattee 6 pericarp	Inner pericarp tissue beginning to show cracks or cottony (Pattee stage 6/7)	3
S17	Pattee 6 seed	Torpedo shaped; generally pink at embryonic-axis end of kernels (Pattee stage 6)	2
S18	Pattee 7 seed	Torpedo to round shaped; embryonic axis end of kernel pink; other end white to light pink (Pattee stage 7)	2
S19	Pattee 8 seed	Round, light pink all over (Pattee stage 8)	2
S20	Pattee 10 seed	Large, generally dark pink all over; seed coat beginning to dry out (Pattee stage 10)	2
